# Supplementary material for: mRNA and protein dataset of autophagy markers (LC3 and p62) in several cell lines
Source: PubMed Central journal article supplement (PMC4802425; doi:10.1016/j.dib.2016.02.085), 2016-03-09
Supplement: mmc1.pdf [file mmc1.pdf]

To view the full contents of this document, you need a later version of the PDF viewer. You can upgrade to the latest version of Adobe Reader from [www.adobe.com/products/acrobat/readstep2.html](http://www.adobe.com/products/acrobat/readstep2.html)

For further support, go to [www.adobe.com/support/products/acrreader.html](http://www.adobe.com/support/products/acrreader.html)
